# Supplementary material for: A pan-cancer analysis of driver gene mutations, DNA methylation and gene expressions reveals that chromatin remodeling is a major mechanism inducing global changes in cancer epigenomes
Source: BMC Med Genomics. 2018 Nov 6;11:98. doi: 10.1186/s12920-018-0425-z (PMC6218985; doi:10.1186/s12920-018-0425-z)
Supplement: Supplementary file 1 — Table S1. Selection of candidate CDGs across tumor types. (XLSX 9 kb) [file 12920_2018_425_MOESM1_ESM.xlsx]

## Sheet: Sheet1
Tumor Type	Sample Size	no. of genes having any nonsilent mutations	no. of genes after MutSig	no. of genes after Mutation	additional screening for COAD, STAD	no. of candidate driver genes mutated in five or more tumor samples with methylation data
				Assessor
BLCA	395	16467	63	63		60
BRCA	978	14939	62	62		36
CESC	194	11706	15	15		15
COAD	367	17073	1436	1433	193	180
GBM	283	7933	27	27		11
HNSC	510	15681	38	38		36
KIRC	476	9893	15	15		9
KIRP	161	7185	14	13		10
LGG	513	11911	60	59		50
LIHC	198	9976	14	14		14
LUAD	533	16716	54	54		49
LUSC	178	13417	16	16		11
PAAD	146	11424	155	154		81
PCPG	178	2061	7	7		5
PRAD	332	6055	15	15		11
SARC	245	8181	19	19		15
STAD	289	16618	553	553	67	62
TGCT	147	5547	42	36		16
THCA	401	3849	9	9		5
UCEC	248	16951	119	119		78
