# Supplementary material for: A pan-cancer analysis of driver gene mutations, DNA methylation and gene expressions reveals that chromatin remodeling is a major mechanism inducing global changes in cancer epigenomes
Source: BMC Med Genomics. 2018 Nov 6;11:98. doi: 10.1186/s12920-018-0425-z (PMC6218985; doi:10.1186/s12920-018-0425-z)
Supplement: Supplementary file 2 — Table S2. A. Number of CDGs mutated in at least 5 samples with methylation data in one tumor type; B. Number of CDGs mutated in at least 5 samples with expression data in one tumor type. (XLSX 8 kb) [file 12920_2018_425_MOESM2_ESM.xlsx]

## Sheet: Sheet1
A. Number of CDGs mutated in at least 5 samples with methylation data in one tumor type
no. of tumor types mutated	1	2	3	4	5	6	7	8	10	11	14	15
no. of CDGs	298	88	27	12	6	5	2	2	1	2	1	1
B. Number of CDGs mutated in at least 5 samples with expression data in one tumor type
no. of tumor types mutated	1	2	3	4	5	6	8	10	11	14
no. of CDGs	289	74	30	9	8	5	2	2	1	2
