# Supplementary material for: A pan-cancer analysis of driver gene mutations, DNA methylation and gene expressions reveals that chromatin remodeling is a major mechanism inducing global changes in cancer epigenomes
Source: BMC Med Genomics. 2018 Nov 6;11:98. doi: 10.1186/s12920-018-0425-z (PMC6218985; doi:10.1186/s12920-018-0425-z)
Supplement: Supplementary file 4 — Table S3. Number of genes in the methylation null pool. (XLSX 36 kb) [file 12920_2018_425_MOESM4_ESM.xlsx]

## Sheet: Sheet1
Tumor type	no. of genes having any mutations including silent mutations in 5 or more samples	no. of genes in the methylation null pool	no. of genes in the expression null pool
BLCA	9384	464	464
BRCA	5485	467	470
CESC	1706	485	485
COAD	11784	423	320
GBM	707	64	160
HNSC	7415	479	479
KIRC	869	300	489
KIRP	276	206	265
LGG	1249	460	460
LIHC	1104	488	488
LUAD	10845	490	490
LUSC	4088	451	489
PAAD	608	428	428
PCPG	18	13	13
PRAD	192	181	181
SARC	523	485	482
STAD	10379	474	435
TGCT	169	153	153
THCA	47	42	42
UCEC	11382	466	0
