# Supplementary material for: A pan-cancer analysis of driver gene mutations, DNA methylation and gene expressions reveals that chromatin remodeling is a major mechanism inducing global changes in cancer epigenomes
Source: BMC Med Genomics. 2018 Nov 6;11:98. doi: 10.1186/s12920-018-0425-z (PMC6218985; doi:10.1186/s12920-018-0425-z)
Supplement: Supplementary file 5 — Table S4. CDGs associated with significant genome-wide methylation changes in one cancer type. Hyper-methylation is defined as CDGs with pi,k <0.05 and the number of hyper-methylated sites is larger than the number of hypo-methylated sites (\documentclass[12pt]{minimal} \usepackage{amsmath} \usepackage{wasysym} \usepackage{amsfonts} \usepackage{amssymb} \usepackage{amsbsy} \usepackage{mathrsfs} \usepackage{upgreek} \setlength{\oddsidemargin}{-69pt} \begin{document}$$ \left|\ {S}_{i,k}^{+}\right|>\left|\ {S}_{i,k}^{-}\right| $$\end{document}Si,k+>Si,k−). Hypo-methylation is defined as CDGs with pi,k <0.05 and the number of hyper-methylated sites is smaller than the number of hypo-methylated sites (\documentclass[12pt]{minimal} \usepackage{amsmath} \usepackage{wasysym} \usepackage{amsfonts} \usepackage{amssymb} \usepackage{amsbsy} \usepackage{mathrsfs} \usepackage{upgreek} \setlength{\oddsidemargin}{-69pt} \begin{document}$$ \left|\ {S}_{i,k}^{+}\right|\le \left|\ {S}_{i,k}^{-}\right| $$\end{document}Si,k+≤Si,k−). (XLSX 11 kb) [file 12920_2018_425_MOESM5_ESM.xlsx]

## Sheet: Sheet1
Tumor	Hyper-methylation	Hypo-methylation
BLCA	RB1	FGFR3, KDM6A, KMT2D, RBM10, STAG2, TP53
BRCA	CDH1, GATA3	TP53
CESC
COAD	BRAF, CAB39L, DNAH6, KMT2B, MGA, RNF43, ZBTB20	PTPN11
GBM	IDH1
HNSC	CASP8, HRAS	NSD1, TP53
KIRC	PBRM1, SETD2
KIRP	SETD2
LGG	ATRX, CIC, FUBP1, IDH1, NIPBL, NOTCH1, STK19, TP53	EGFR, NF1, PTEN, RB1
LIHC	BAP1	CTNNB1, TP53
LUAD		KEAP1, SMARCA4, STK11, TP53, WDR66
LUSC
PAAD
PCPG		HRAS, NF1
PRAD		FOXA1, SPOP
SARC
STAD	ALDH2, ARID1A, ARID1B, CDH1, CDK12, EPHA2, IRS4, KMT2C, KMT2D, MSH6, OPLAH, PIK3CA, PTEN, ZBTB20, ZFHX3	FBXW7, KMT2B, RNF43, TP53, ZBTB7C, ZFP36L2
TGCT	CSGALNACT2	CDC27, KIT, KRAS, NRAS
THCA	NRAS	BRAF
UCEC	PTEN	CTNNB1, TP53
