# Supplementary material for: A pan-cancer analysis of driver gene mutations, DNA methylation and gene expressions reveals that chromatin remodeling is a major mechanism inducing global changes in cancer epigenomes
Source: BMC Med Genomics. 2018 Nov 6;11:98. doi: 10.1186/s12920-018-0425-z (PMC6218985; doi:10.1186/s12920-018-0425-z)
Supplement: Supplementary file 7 — Table S5. Results from stratified analysis for the rest of the 15 cancer types (other than LGG) whose genome-wide methylation patterns were affected by one of the identified 32 major MDGs. (XLSX 10 kb) [file 12920_2018_425_MOESM7_ESM.xlsx]

## Sheet: Sheet1
Tumor Type	Stratified driver gene	Mutated stratum			Wilde-type stratum
	(direction, p-value)	Driver genes	Direction	p-value	Driver genes	Direction	p-value
BLCA	FGFR3 (hypo, 0.000142)	NA			KMT2D	hypo	0.0129
					RB1	hyper	0.0266
BRCA	TP53 (hypo, 0)	NA			CDH1	hyper	0.0249
COAD	RNF43 (hyper, 0.00612)	NA			NA
GBM	IDH1 (hyper, 0.0186)	NA			NA
HNSC	NSD1 (hypo, 0)	NA			HRAS	hyper	0.00797
					TP53	hypo	0.000142
KIRC	SET2 (hyper, 0.0391)	NA			NA
KIRP	SET2 (hyper, 0.0274)	NA			NA
LIHC	BAP1 (hyper, 0.000142)	NA			CTNNB1	hypo	0.00755
					RB1	hyper	0.0454
					TP53	hypo	0.0109
LUAD	KEAP1 (hypo, 0.000142)	NA			SMARCA4	hypo	0.0349
					STK11	hypo	0.002137
					TP53	hypo	0.00227
PCPG	FOXA1 (hypo, 0.0112)	NA			NF1	hypo	0.0121
PRAD	FOXA1 (hypo, 0.0112)	NA			NA
STAD	TP53 (hypo, 0.000142)	ARID1A	hyper	0.033	ARID1A	hyper	0.00341
		RNF43	hyper	0.0198	CDH1	hypo	0.0349
					EPHA2	hyper	0.0125
					KMT2D	hypo	0.00256
					KMT2C	hyper	0.00783
					KMT4B	hypo	0.00128
					PIK3CA	hyper	0.000142
					RNF43	hypo	0.000142
					ZBTB20	hypo	0.0136
TGCT	KRAS (hypo, 0)	NA			KIT	hypo	0
					NRAS	hypo	0
THCA	BRAF (hypo, 0.00199)	NA			NA
UCEC	TP53 (hypo, 0.00213)	NA			NA
