# Supplementary material for: A pan-cancer analysis of driver gene mutations, DNA methylation and gene expressions reveals that chromatin remodeling is a major mechanism inducing global changes in cancer epigenomes
Source: BMC Med Genomics. 2018 Nov 6;11:98. doi: 10.1186/s12920-018-0425-z (PMC6218985; doi:10.1186/s12920-018-0425-z)
Supplement: Supplementary file 8 — Table S6. Number of tumor samples with mutations in each of the 21 chromatin regulator genes in list B. (XLSX 10 kb) [file 12920_2018_425_MOESM8_ESM.xlsx]

## Sheet: Sheet1
Tumor types	DNMT1	DNMT3A	DNMT3B	EYA4	SETBP1	PRDM2	PRDM5	CBX7	DUSP1	KAT2B	RAD54L	WHSC1	EZH2	UHRF1	PCNA	TTF2	KDM1A	SUV39H2	HDAC1	TDG	TET3
BLCA	8	10	5	7	10	15	9	1	3	4	6	13	6	9	3	7	6	0	4	3	6
BRCA	8	5	0	4	5	7	3	1	1	6	2	6	2	4	0	1	3	1	6	1	5
CESC	2	1	0	0	3	4	2	1	1	1	2	3	3	3	1	6	1	1	0	0	1
COAD	6	9	9	7	7	11	3	1	5	11	6	11	27	5	0	6	1	3	4	2	9
GBM	1	0	0	1	1	0	1	0	0	0	1	0	1	0	0	0	1	1	0	1	1
HNSC	8	11	5	5	5	7	3	3	2	2	3	6	3	7	1	4	2	0	1	4	3
KIRC	5	7	2	0	3	1	1	0	0	2	1	1	2	3	2	1	0	2	1	0	3
KIRP	1	4	2	1	1	2	0	0	0	0	0	1	0	0	0	2	1	1	0	5	0
LGG	2	9	2	1	1	4	0	0	0	0	2	0	2	0	0	1	2	0	0	3	1
LIHC	3	1	0	1	0	6	1	0	1	3	0	2	0	0	0	1	0	1	1	0	1
LUAD	5	18	7	14	36	11	5	1	1	8	5	10	11	5	1	7	3	3	3	6	7
LUSC	4	5	3	6	6	3	3	1	0	3	1	0	2	2	0	2	1	2	2	3	2
PAAD	0	3	3	1	2	3	2	0	0	1	2	0	1	1	0	1	3	2	0	0	1
PCPG	0	1	0	0	1	1	0	0	0	0	0	1	0	0	0	0	0	0	0	0	0
PRAD	3	1	0	0	1	2	0	0	1	0	0	0	0	1	0	0	1	0	0	0	0
SARC	2	3	2	1	0	2	0	0	1	0	0	2	0	3	0	0	0	0	0	1	2
STAD	7	6	8	14	19	17	9	2	2	9	2	12	3	10	2	11	3	2	4	3	10
TGCT	1	1	1	1	1	1	0	0	0	0	0	1	4	1	0	1	0	0	0	0	1
THCA	2	2	0	1	2	0	0	0	0	0	0	0	0	0	0	0	0	0	0	0	1
UCEC	9	6	12	12	10	11	9	2	2	9	6	10	11	6	2	6	3	2	4	2	5
