# Supplementary material for: A pan-cancer analysis of driver gene mutations, DNA methylation and gene expressions reveals that chromatin remodeling is a major mechanism inducing global changes in cancer epigenomes
Source: BMC Med Genomics. 2018 Nov 6;11:98. doi: 10.1186/s12920-018-0425-z (PMC6218985; doi:10.1186/s12920-018-0425-z)
Supplement: Supplementary file 9 — Table S7. Chromatin regulators dysregulated by IDH1 and CIC in LGG. |Ti| is number of tumor types whose genome-wide methylation levels are significantly associated with the mutation status of CDG i; N1 is number of genome-wide genes whose expression levels are dysregulated by MDG i in all |Ti| tumor types; N2 is number of genes in list A that are dysregulated in all |Ti| tumor types; N3 is number of genes in list B that are dysregulated in all |Ti| tumor types; Enrichment PvalueA and PvalueB are calculated using hypergeometric distributions testing if genes in lists A and B occur more frequently than expected by random chance among genome-wide differentially expressed target genes. (XLSX 9 kb) [file 12920_2018_425_MOESM9_ESM.xlsx]

## Sheet: Sheet1
MDGs	Selected LGG tumors	N1	N2 (# of dysregulated genes in list A)	Enrichment PvalueA	N3(# of dysregulated genes in list B)	Enrichment PvalueB	Genes in list B that are dysregulated
		(# of genome-wide dysregulated genes)
IDH1	All LGG tumors	12939	522	1.1e-08	15	0.29	DNMT1 DNMT3A DNMT3B EYA4 SETBP1 PRDM2 PRDM5 DUSP1 RAD54L EZH2 PCNA TTF2 SUV39H2 HDAC1 TET3
CIC	All LGG tumors	11411	467	7.5e-08	15	0.11	DNMT3A EYA4 SETBP1 PRDM2 PRDM5 DUSP1 RAD54L WHSC1 EZH2 UHRF1 PCNA TTF2 KDM1A SUV39H2 HDAC1
CIC	Within IDH1 wild-type	5460	256	3e-08	7	0.31	DNMT3A EYA4 SETBP1 PRDM2 TTF2 HDAC1 TET3
CIC	Within IDH1 mutations	10650	420	0.00014	15	0.056	DNMT3A DNMT3B SETBP1 PRDM2 PRDM5 DUSP1 RAD54L WHSC1 EZH2 UHRF1 TTF2 KDM1A SUV39H2 HDAC1 TET3
