# Supplementary material for: A pan-cancer analysis of driver gene mutations, DNA methylation and gene expressions reveals that chromatin remodeling is a major mechanism inducing global changes in cancer epigenomes
Source: BMC Med Genomics. 2018 Nov 6;11:98. doi: 10.1186/s12920-018-0425-z (PMC6218985; doi:10.1186/s12920-018-0425-z)
Supplement: Supplementary file 10 — Table S8. CDGs associated with significant genome-wide expression changes in one cancer type. Up-regulation is defined as CDGs with \documentclass[12pt]{minimal} \usepackage{amsmath} \usepackage{wasysym} \usepackage{amsfonts} \usepackage{amssymb} \usepackage{amsbsy} \usepackage{mathrsfs} \usepackage{upgreek} \setlength{\oddsidemargin}{-69pt} \begin{document}$$ {p}_{i,k}^{\prime } $$\end{document}pi,k′<0.05 and the number of up-regulated genes is larger than the number of down-regulated genes (\documentclass[12pt]{minimal} \usepackage{amsmath} \usepackage{wasysym} \usepackage{amsfonts} \usepackage{amssymb} \usepackage{amsbsy} \usepackage{mathrsfs} \usepackage{upgreek} \setlength{\oddsidemargin}{-69pt} \begin{document}$$ \left|\ {G}_{i,k}^{+}\right|>\left|\ {G}_{i,k}^{-}\right| $$\end{document}Gi,k+>Gi,k−). Down-regulation is defined as CDGs with \documentclass[12pt]{minimal} \usepackage{amsmath} \usepackage{wasysym} \usepackage{amsfonts} \usepackage{amssymb} \usepackage{amsbsy} \usepackage{mathrsfs} \usepackage{upgreek} \setlength{\oddsidemargin}{-69pt} \begin{document}$$ {p}_{i,k}^{\prime } $$\end{document}pi,k′<0.05 and the number of up-regulated genes is smaller than the numsber of down-regulated genes (\documentclass[12pt]{minimal} \usepackage{amsmath} \usepackage{wasysym} \usepackage{amsfonts} \usepackage{amssymb} \usepackage{amsbsy} \usepackage{mathrsfs} \usepackage{upgreek} \setlength{\oddsidemargin}{-69pt} \begin{document}$$ \left|\ {G}_{i,k}^{+}\right|\le \left|\ {G}_{i,k}^{-}\right| $$\end{document}Gi,k+≤Gi,k−). (XLSX 9 kb) [file 12920_2018_425_MOESM10_ESM.xlsx]

## Sheet: Sheet1
Tumor	Up-regulation	Down-regulation
BLCA	KDM6A, RB1, TP53	FGFR3
BRCA	TP53	CDH1, GATA3, MAP3K1, PIK3CA
CESC	ARID1A
COAD	DNAH6, JAK1, TFE3, TP53	APC, BRAF, CACNA1D, CDK12, IRS4, KMT2B, KRAS, RNF43, ZBTB20
GBM	ATRX, IDH1, TP53
HNSC	NSD1	CASP8, HRAS, NOTCH1, TP53
KIRC	TP53	PBRM1, VHL
KIRP
LGG	EGFR, NF1, PTEN, RB1	ATRX, CIC, FUBP1, IDH1, IDH2, NOTCH1, TP53
LIHC	BAP1, TP53	CTNNB1
LUAD	EGFR, RB1, SMARCA4, TP53	KEAP1, KRAS, STK11
LUSC
PAAD	KIAA1202	KRAS
PCPG		HRAS
PRAD	FOXA1	SPOP
SARC		TP53
STAD	CDH1, TP53	ARID1A, ARID1B, EPHA2, KMT2B, KMT2C, KMT2D, PIK3CA, RNF43, ZBTB20, ZFHX3
TGCT	NRAS	CSGALNACT2, KIT, KRAS
THCA	NRAS	BRAF, HRAS
UCEC		PIK3R1
