# Supplementary material for: A pan-cancer analysis of driver gene mutations, DNA methylation and gene expressions reveals that chromatin remodeling is a major mechanism inducing global changes in cancer epigenomes
Source: BMC Med Genomics. 2018 Nov 6;11:98. doi: 10.1186/s12920-018-0425-z (PMC6218985; doi:10.1186/s12920-018-0425-z)
Supplement: Supplementary file 11 — Table S9. Correlation between methylation and expression changes in each cancer type. K1 is number of CDGs mutated in ≥ 5 samples with expression data available; K2 is number of CDGs mutated in ≥ 5 samples with methylation data available; E is set of CDGs with pi,k’<0.05, that is, CDGs whose mutation status are significantly associated with f differentially expressed genes; M is set of CDGs with pi,k<0.05, that is, CDGs whose mutation status are significantly associated with differential methylation; ‘cor’ stands for correlation between the number of differentially methylated sites and the number of differentially expressed genes by the CDG mutation. (XLSX 9 kb) [file 12920_2018_425_MOESM11_ESM.xlsx]

## Sheet: Sheet1
	K1	K2	|E|	|M|	|E ÇM|	Correlation
BLCA	60	60	4	7	4	0.79
BRCA	57	36	5	3	3	0.91
CESC	15	15	1	0	0	0.76
COAD	176	180	13	8	5	0.69
GBM	13	11	3	1	1	0.58
HNSC	36	36	5	4	4	0.84
KIRC	11	9	3	2	1	0.53
KIRP	11	10	0	1	0	0.65
LGG	50	50	11	12	10	0.94
LIHC	14	14	3	3	3	0.87
LUAD	51	49	7	5	4	0.9
LUSC	15	11	0	0	0	0.63
PAAD	81	81	2	0	0	0.5
PCPG	5	5	1	2	1	0.96
PRAD	11	11	2	2	2	0.92
SARC	15	15	1	0	0	0.6
STAD	64	62	12	21	12	0.82
TGCT	16	16	4	5	4	0.95
THCA	5	5	3	2	2	0.97
UCEC	2	78	1	3	0	NA
